# Supplementary material
Source: PubMed Central journal article supplement (PMC4650625)
Supplement: cr2015108x2.pdf [file cr2015108x2.pdf]

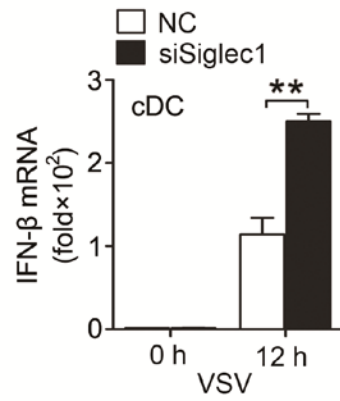

**Supplementary information, Figure S2. Siglec1 suppresses VSV-triggered type I IFN production in cDC** (Related to **Figure 2**). Q-PCR analysis of IFN- $\beta$  mRNA from cDC transfected with Siglec1 siRNA#1 and infected by VSV at an MOI 10 as indicated time. Data are shown as means  $\pm$  SD. \*\* $p < 0.01$ .
