# Supplementary material
Source: PubMed Central journal article supplement (PMC4650625)
Supplement: cr2015108x5.pdf [file cr2015108x5.pdf]

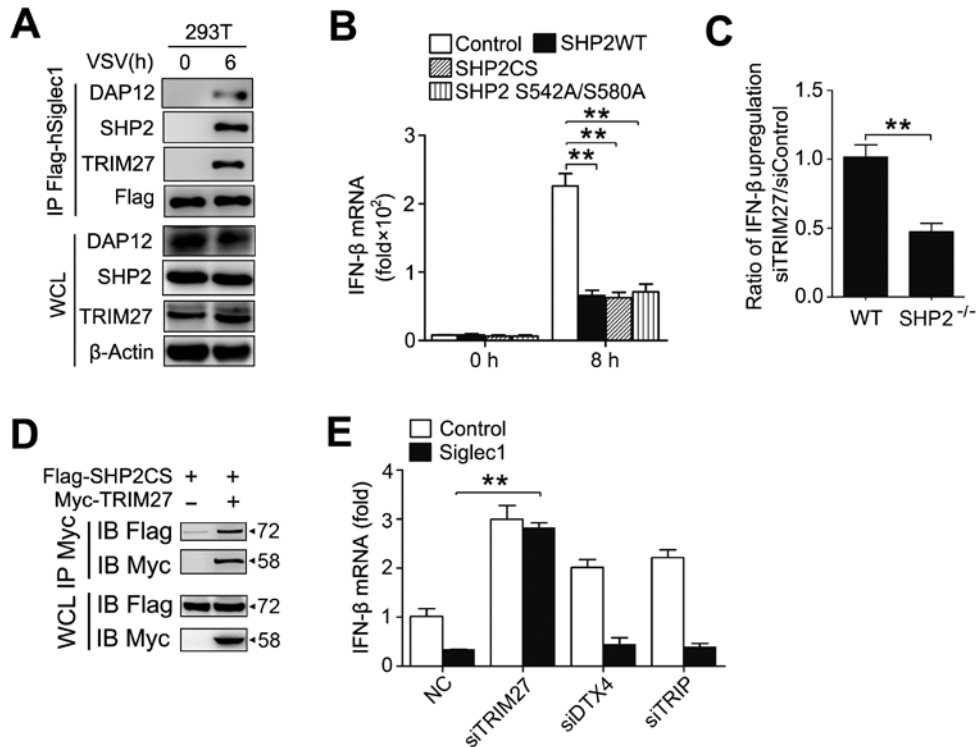

**Supplementary information, Figure S5. Recruitment of TRIM27 by SHP2 inhibits VSV-triggered type I IFN production in macrophages** (Related to **Figure 5**). (A) IP and immunoblot analysis of DAP12, SHP2 and TRIM27 in lysates of VSV-infected (MOI=10) HEK293T precipitated with Flag-hSiglec1. (B) Q-PCR analysis of IFN-β mRNA in SHP2-deficient macrophages transfected with control vector, SHP2WT, SHP2CS or SHP2S542A/S580A plasmids and infected with VSV as indicated. (C) Ratio analysis of IFN-β upregulation after Q-PCR analysis of IFN-β mRNA in WT or SHP2-deficient macrophages transfected with NC or siTRIM27 and infected with VSV as indicated. (D) IP and immunoblot analysis of HEK293T cells after co-transfection of TRIM27 and SHP2CS as indicated. (E) Q-PCR analysis of IFN-β mRNA in RAW264.7 cell clones stably overexpressing Siglec1 transfected with TRIM27 siRNA, DTX4 siRNA or TRIP siRNA for 48 h, then infected with VSV for 8 h. Data are shown as means ± SD or representative photographs. \*\* $p < 0.01$ .
