# Supplementary material
Source: PubMed Central journal article supplement (PMC4650625)
Supplement: cr2015108x9.pdf [file cr2015108x9.pdf]

**Supplementary information, Table S2. Primers used for Q-PCR**

| Genes                 |         | Primer sequences (5' to 3') |
|-----------------------|---------|-----------------------------|
| mouse STAT1           | Forward | GCTGCCTATGATGTCTCGTTT       |
|                       | Reverse | TGCTTTTCCGTATGTTGTGCT       |
| VSV                   | Forward | ACGGCGTACTTCCAGATGG         |
|                       | Reverse | CTCGGTTCAAGATCCAGGT         |
| mouse IFN- $\alpha$ 4 | Forward | ACTCAGCAGACCTTGAACCT        |
|                       | Reverse | CAGTCTTGGCAGCAAGTTGAC       |
| mouse IFN- $\beta$    | Forward | CAGCTCCAAGAAAGGACGAAC       |
|                       | Reverse | GGCAGTGTAACCTCTTCTGCAT      |
| mouse TRIM27          | Forward | AGAACCGACTGGACCACCTAA       |
|                       | Reverse | TGCTCCTTCAACGAGTGATAGA      |
| mouse Siglec1         | Forward | GCTGGTGGACAAGCGTTTC         |
|                       | Reverse | TTCAAGTCTTTGAGCAACAGGT      |
